# Supplementary material for: Elevated ALOX12 in renal tissue predicts progression in diabetic kidney disease
Source: PubMed Central journal article supplement (PMC10863531; doi:10.1080/0886022x.2024.2313182), 2024-02-12
Supplement: IRNF_A_2313182_SM1760.pdf [file IRNF_A_2313182_SM1760.pdf]

**Supplementary table I Primer sequences of RT-PCR.**

---

| <b>Primer</b>  | <b>Forward primer</b>  | <b>Reverse primer</b>    |
|----------------|------------------------|--------------------------|
| ALOX12         | GTGGCTGAGGTCATCGCTGTTG | GTAACGGATGTGTGGAACGAGGAG |
| $\beta$ -actin | GGACTTCGAGCAAGAGATGG   | AGCACTGTGTTGGCGTACAG     |

---

**Supplementary table II Renal function data in mice**

|                                   | <b>db/m</b>  | <b>db/db</b>   | <b><i>P</i></b> |
|-----------------------------------|--------------|----------------|-----------------|
| <b>Blood glucose(mmol/L)</b>      | 7.550±0.914  | 25.570±4.234   | <0.001          |
| <b>24h Urine albumin (mg/24h)</b> | 7.322±2.550  | 178.500±25.430 | <0.001          |
| <b>Serum Creatinine(μmol/L)</b>   | 17.580±2.625 | 61.110±9.557   | <0.001          |
| <b>Serum BUN(mmol/L)</b>          | 15.290±1.532 | 27.380±2.644   | <0.001          |
